# Supplementary material for: Soil Acidification in Nutrient-Enriched Soils Reduces the Growth, Nutrient Concentrations, and Nitrogen-Use Efficiencies of Vachellia sieberiana (DC.) Kyal. & Boatwr Saplings
Source: MDPI journal article supplement (doi:10.3390/plants11243564), 2022-12-17
Supplement: s1 [file s1]

## Supplementary material

Table S1. Pearson's and Spearman's correlation for the soil chemical parameters. Distribution of all soil variables were not performed; thus we show both parametric and non-parametric statistical procedures

| Soil variable 1 | Soil variable 2      | Pearson's correlation | Spearman's correlation |
|-----------------|----------------------|-----------------------|------------------------|
| Aluminium       | Calcium              | -0.228                | -0.070                 |
| Aluminium       | Magnesium            | -0.676                | -0.545                 |
| Calcium         | Magnesium            | 0.271                 | 0.350                  |
| Aluminium       | Manganese            | 0.738                 | 0.713                  |
| Calcium         | Manganese            | -0.489                | -0.126                 |
| Magnesium       | Manganese            | -0.223                | -0.049                 |
| Aluminium       | Zinc                 | -0.116                | -0.182                 |
| Calcium         | Zinc                 | 0.596                 | 0.594                  |
| Magnesium       | Zinc                 | -0.090                | 0.077                  |
| Manganese       | Zinc                 | -0.324                | -0.021                 |
| Aluminium       | pH                   | -0.506                | -0.573                 |
| Calcium         | pH                   | 0.095                 | 0.021                  |
| Magnesium       | pH                   | 0.102                 | 0.196                  |
| Manganese       | pH                   | -0.684                | -0.329                 |
| Zinc            | pH                   | 0.402                 | 0.133                  |
| Aluminium       | Exchangeable acidity | 0.420                 | 0.769                  |
| Calcium         | Exchangeable acidity | -0.006                | -0.056                 |
| Magnesium       | Exchangeable acidity | 0.119                 | -0.357                 |
| Manganese       | Exchangeable acidity | 0.687                 | 0.524                  |
| Zinc            | Exchangeable acidity | -0.346                | -0.133                 |
| pH              | Exchangeable acidity | -0.909                | -0.916                 |
| Aluminium       | Nitrogen             | 0.586                 | 0.622                  |
| Calcium         | Nitrogen             | -0.456                | -0.378                 |

|                      |            |        |        |
|----------------------|------------|--------|--------|
| Magnesium            | Nitrogen   | -0.288 | -0.266 |
| Manganese            | Nitrogen   | 0.802  | 0.483  |
| Zinc                 | Nitrogen   | -0.417 | -0.545 |
| pH                   | Nitrogen   | -0.559 | -0.448 |
| Exchangeable acidity | Nitrogen   | 0.547  | 0.587  |
| Aluminium            | Phosphorus | 0.036  | 0.014  |
| Calcium              | Phosphorus | 0.730  | 0.755  |
| Magnesium            | Phosphorus | -0.354 | -0.231 |
| Manganese            | Phosphorus | -0.523 | -0.329 |
| Zinc                 | Phosphorus | 0.658  | 0.538  |
| pH                   | Phosphorus | 0.230  | -0.028 |
| Exchangeable acidity | Phosphorus | -0.350 | 0.049  |
| Nitrogen             | Phosphorus | -0.387 | -0.301 |
| Aluminium            | Iron       | 0.188  | 0.280  |
| Calcium              | Iron       | 0.386  | 0.203  |
| Magnesium            | Iron       | -0.324 | -0.462 |
| Manganese            | Iron       | -0.022 | 0.196  |
| Zinc                 | Iron       | 0.708  | 0.476  |
| pH                   | Iron       | 0.117  | -0.007 |
| Exchangeable acidity | Iron       | -0.060 | 0.147  |
| Nitrogen             | Iron       | 0.040  | 0.000  |
| Phosphorus           | Iron       | 0.478  | 0.406  |
